# Supplementary figures and images for: VUV excited-state dynamics of cyclic ethers as a function of ring size
Source: Royal Society of Chemistry journal article supplement (doi:10.1039/d0cp04292g), 2020-01-01

Pump-probe delay/ps

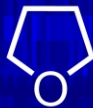

0.5  
0.4  
0.3  
0.2  
0.1  
0.0  
-0.1

$m/z$

40 45 50 55 60 65 70 75

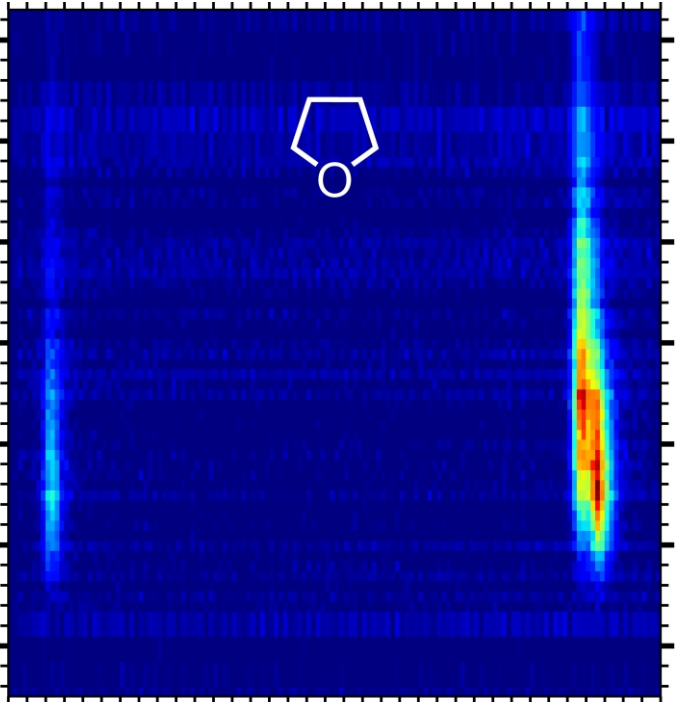

Supplement: d0cp04292g2.zip [file THF_TRMS.pdf › SI_figures/2DTRMS/THF_TRMS.pdf]

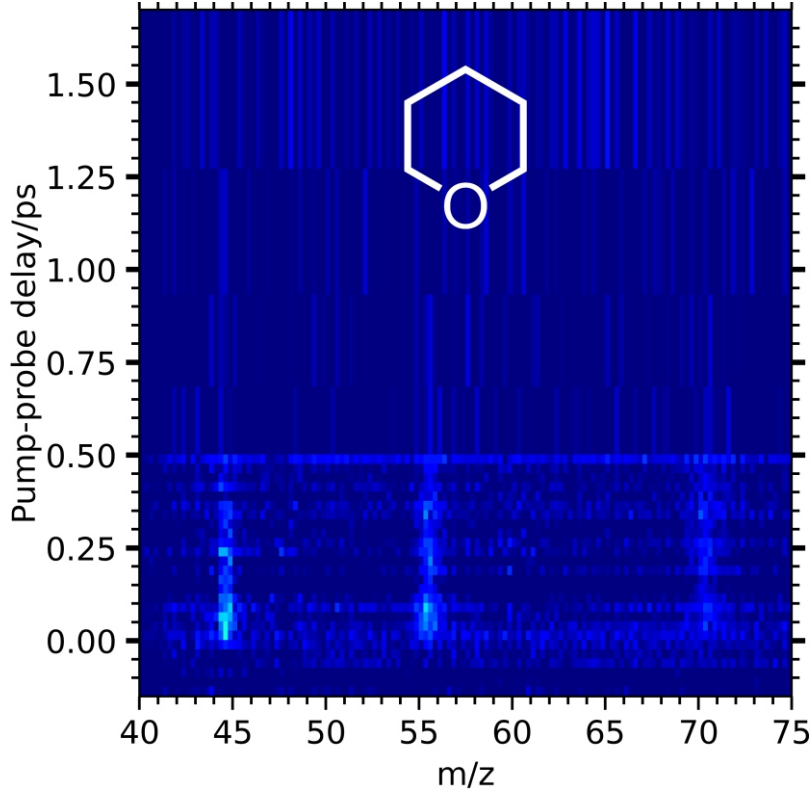

Supplement: d0cp04292g2.zip [file THP_TRMS.pdf › SI_figures/2DTRMS/THP_TRMS.pdf]

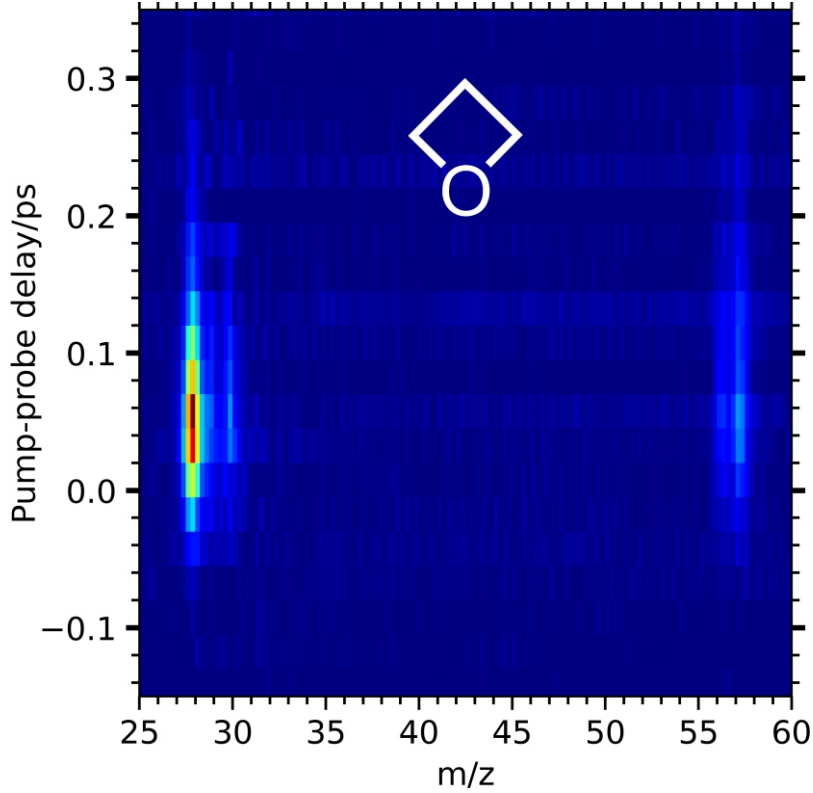

Supplement: d0cp04292g2.zip [file TMO_TRMS.pdf › SI_figures/2DTRMS/TMO_TRMS.pdf]

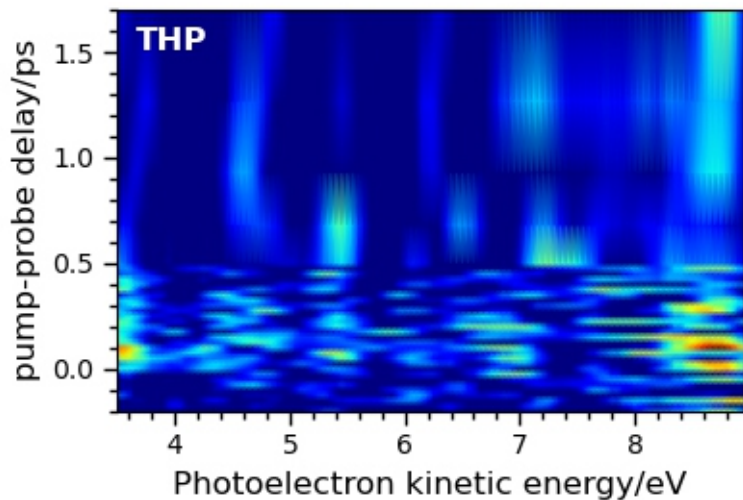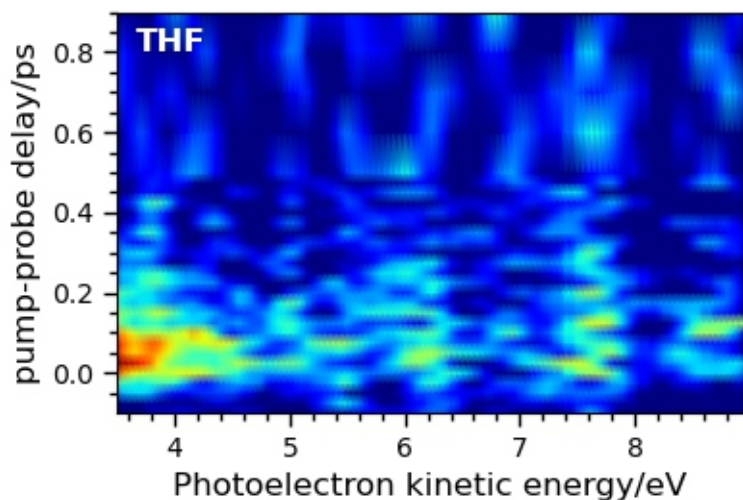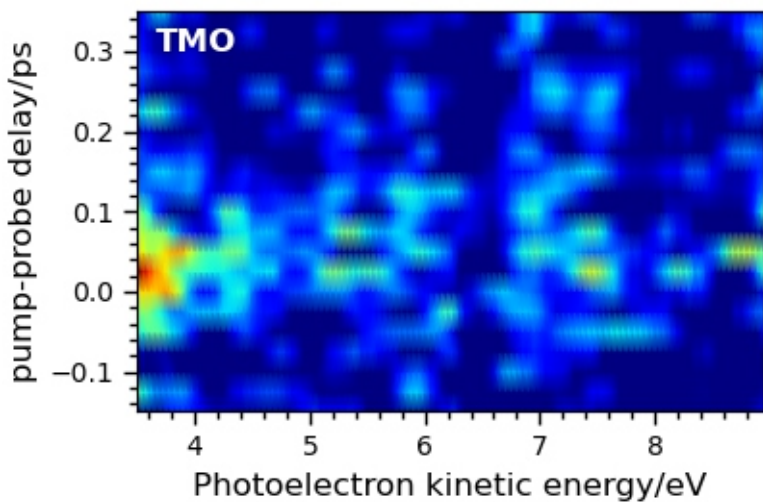

Supplement: d0cp04292g2.zip [file 2photon_probe.pdf › SI_figures/2photon_probe/2photon_probe.pdf]

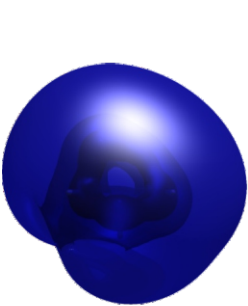

FC

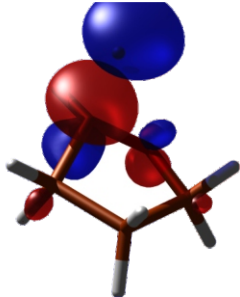

$d(\text{C}_{\alpha\text{O}}-\text{H})=1.75 \text{ \AA}$

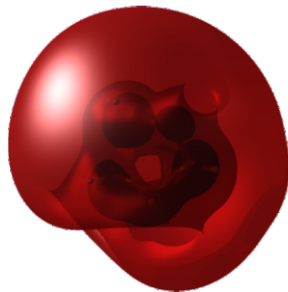

$d(\text{C}_{\alpha\text{O}}-\text{C})=2.1 \text{ \AA}$

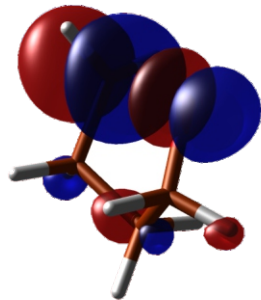

$d(\text{C}-\text{O})=2.0 \text{ \AA}$

Supplement: d0cp04292g2.zip [file THF_ntos.pdf › SI_figures/NTOs/THF_ntos.pdf]

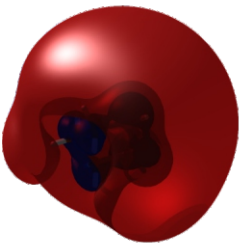

FC

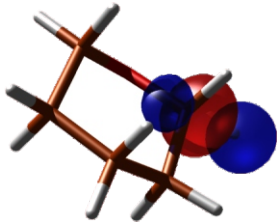

$d(\text{C}_{\alpha\text{O}}-\text{H})=1.75 \text{ \AA}$

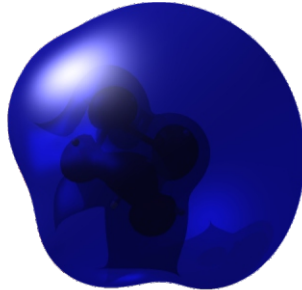

$d(\text{C}_{\alpha\text{O}}-\text{C})=2.1 \text{ \AA}$

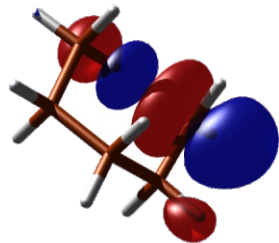

$d(\text{C}-\text{O})=2.0 \text{ \AA}$

Supplement: d0cp04292g2.zip [file THP_ntos.pdf › SI_figures/NTOs/THP_ntos.pdf]

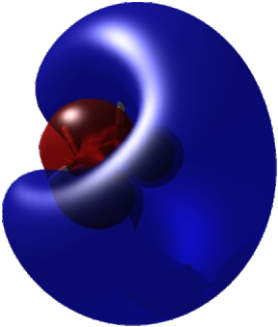

FC

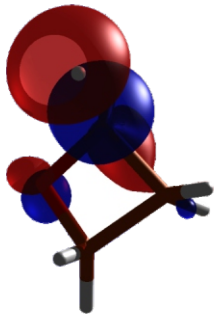

$d(\text{C}_{\alpha\text{O}}-\text{H})=1.75 \text{ \AA}$

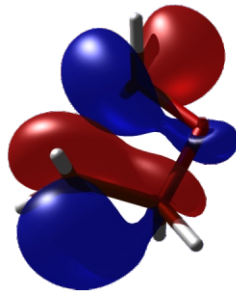

$d(\text{C}_{\alpha\text{O}}-\text{C})=2.1 \text{ \AA}$

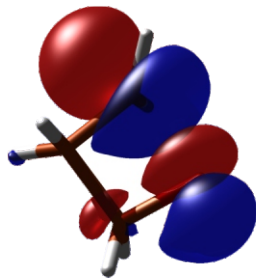

$d(\text{C}-\text{O})=2.0 \text{ \AA}$

Supplement: d0cp04292g2.zip [file TMO_ntos.pdf › SI_figures/NTOs/TMO_ntos.pdf]

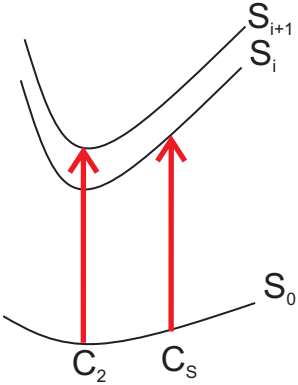

Supplement: d0cp04292g2.zip [file Rydberg_PES.pdf › SI_figures/Rydberg_PES.pdf]

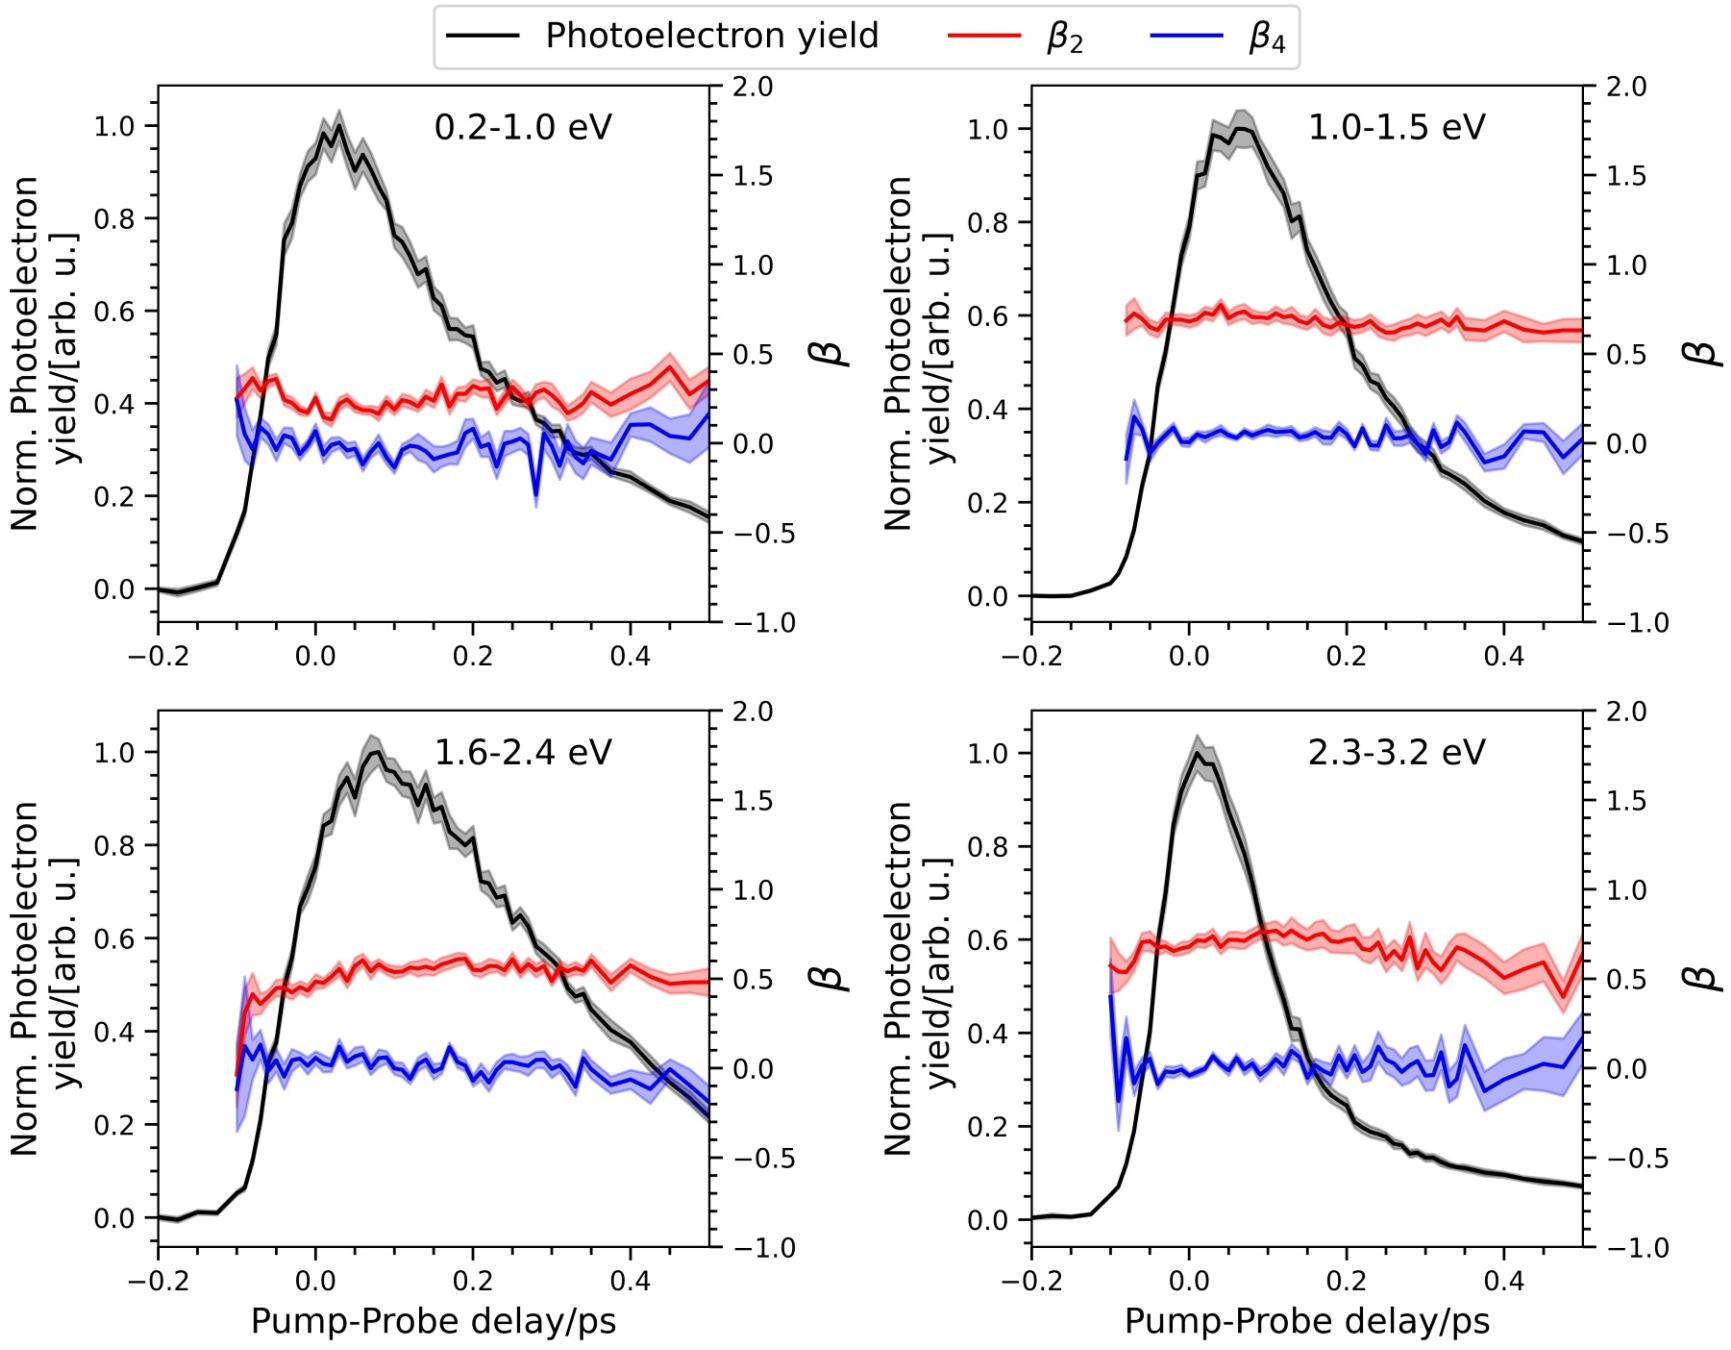

Supplement: d0cp04292g2.zip [file thf_betas.pdf › SI_figures/betas/thf_betas.pdf]

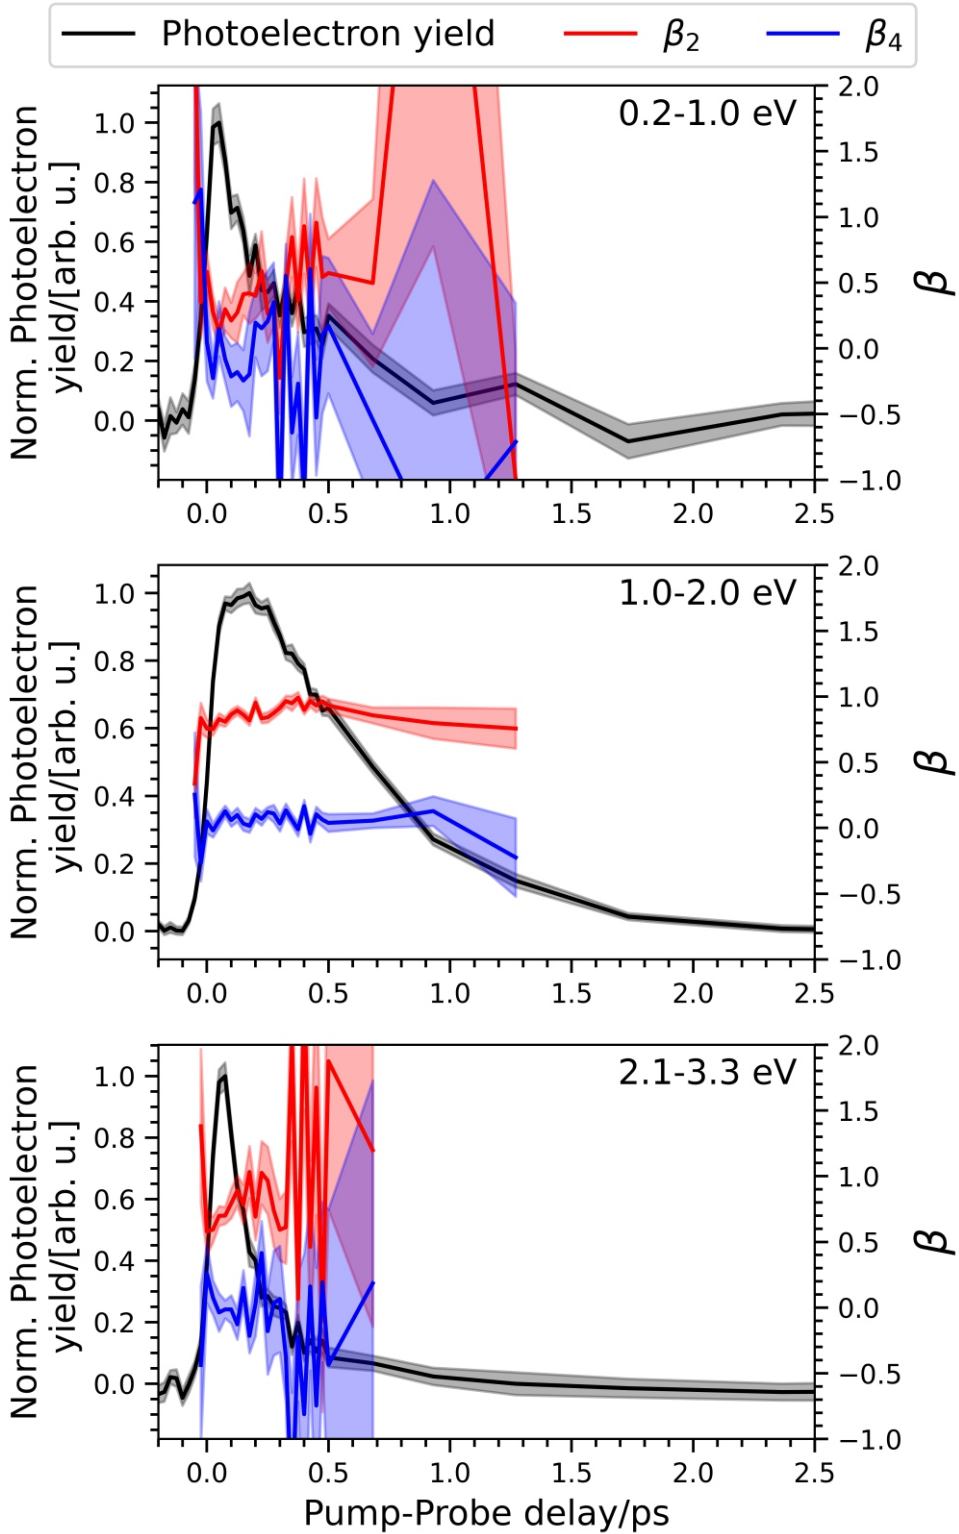

Supplement: d0cp04292g2.zip [file thp_betas.pdf › SI_figures/betas/thp_betas.pdf]

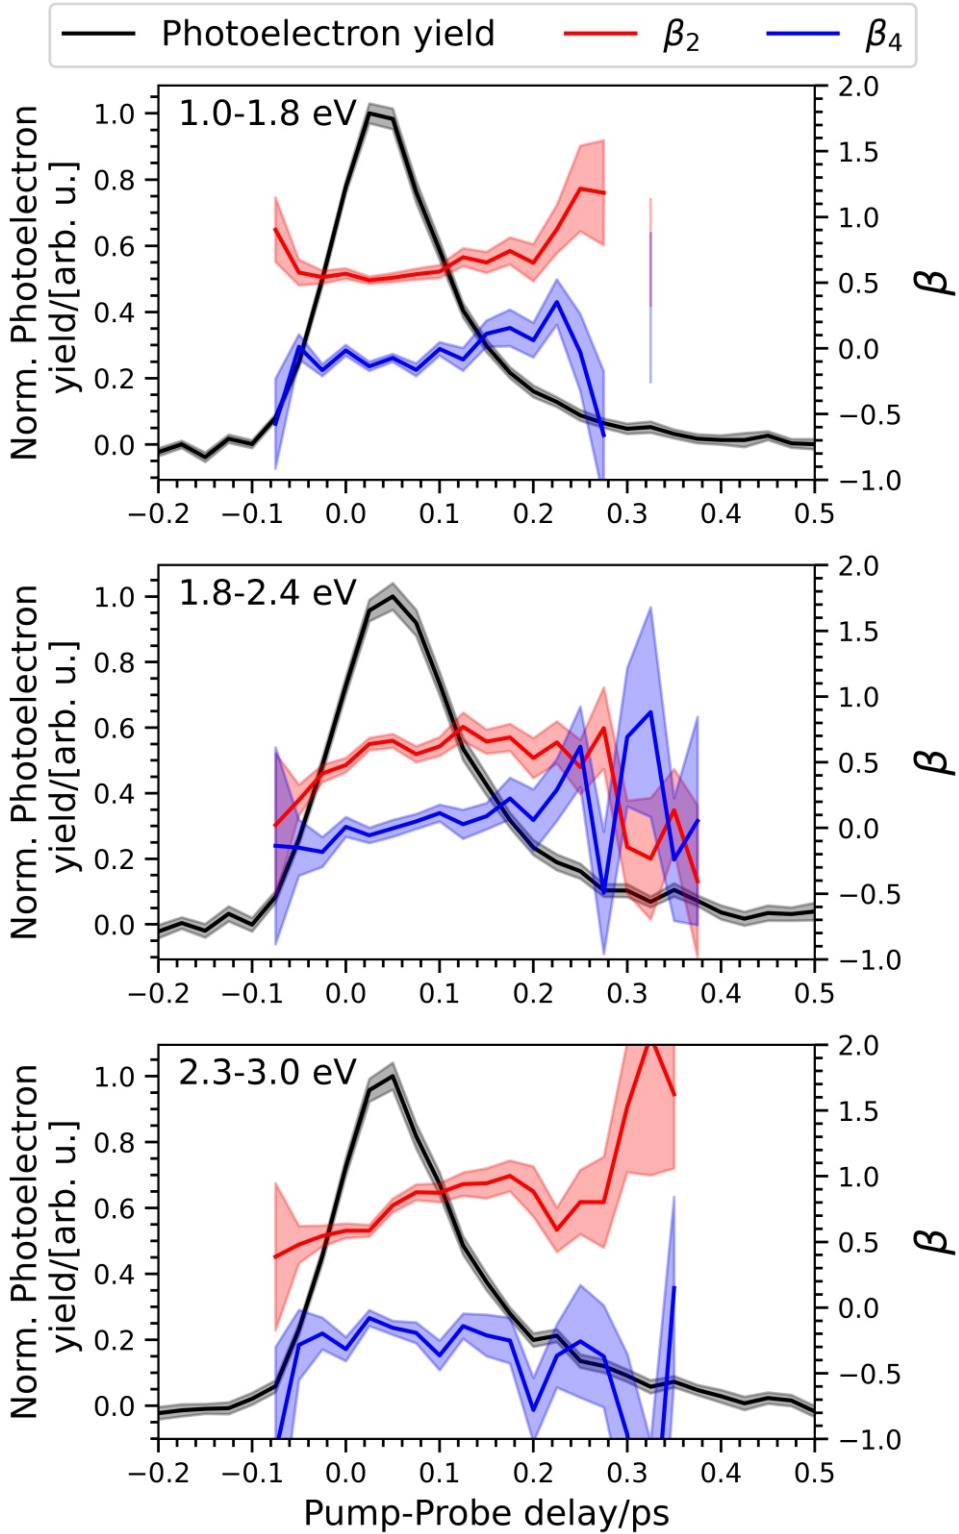

Supplement: d0cp04292g2.zip [file tmo_betas.pdf › SI_figures/betas/tmo_betas.pdf]

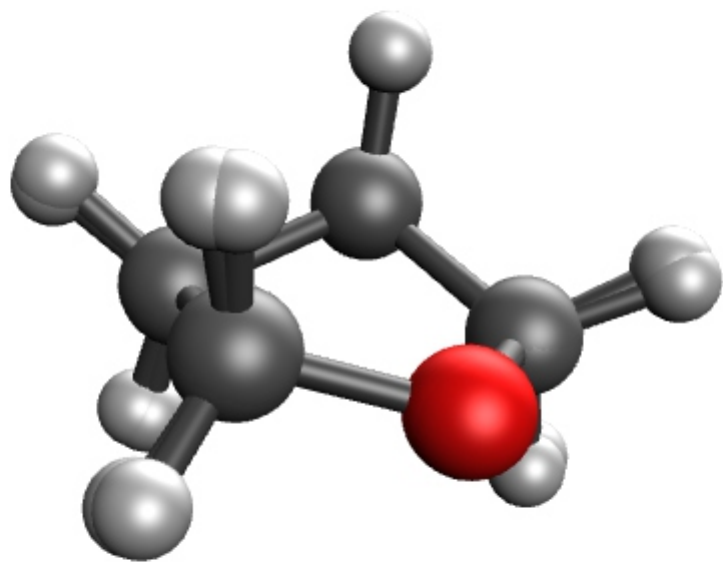

Supplement: d0cp04292g2.zip [file mp2_thf_overlay_cation_neutral.pdf › SI_figures/pictures_cation_neutral/mp2_thf_overlay_cation_neutral.pdf]

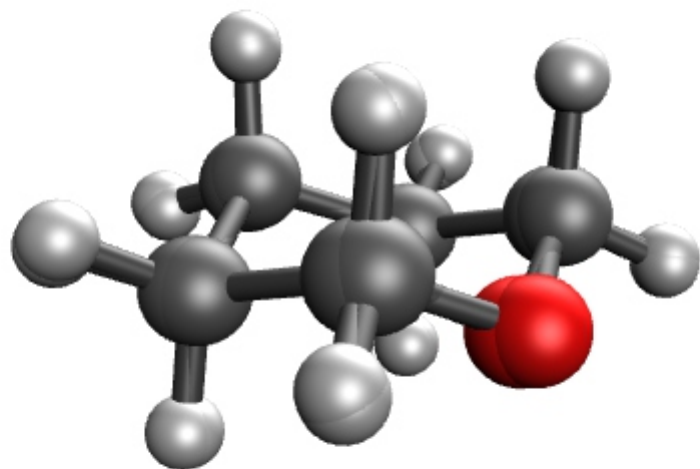

Supplement: d0cp04292g2.zip [file mp2_thp_overlay_cation_neutral.pdf › SI_figures/pictures_cation_neutral/mp2_thp_overlay_cation_neutral.pdf]

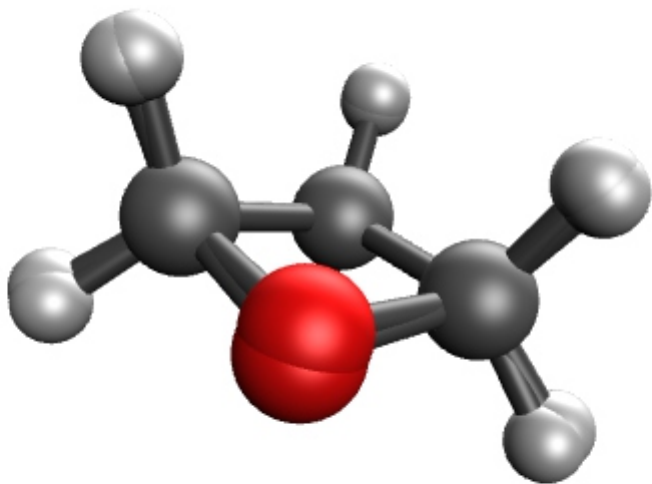

Supplement: d0cp04292g2.zip [file mp2_tmo_overlay_cation_neutral.pdf › SI_figures/pictures_cation_neutral/mp2_tmo_overlay_cation_neutral.pdf]

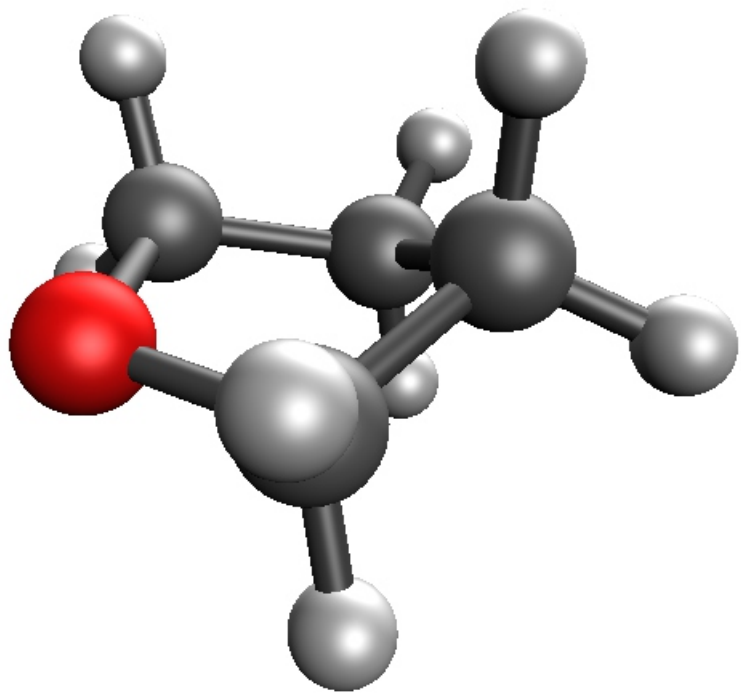

Supplement: d0cp04292g2.zip [file thf.pdf › SI_figures/pictures_molecules/thf.pdf]

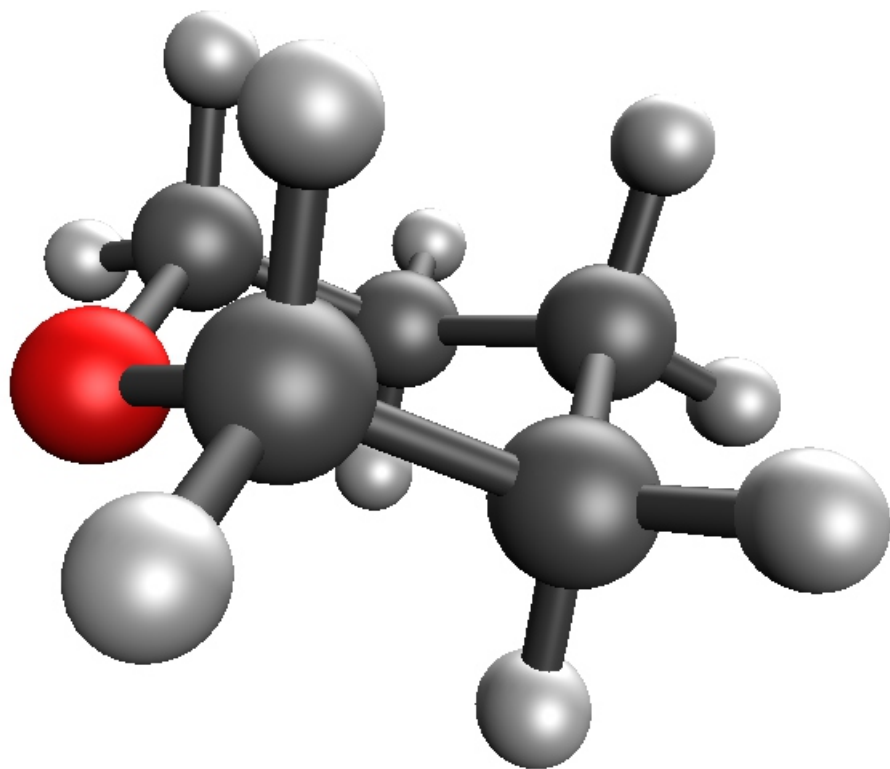

Supplement: d0cp04292g2.zip [file thp.pdf › SI_figures/pictures_molecules/thp.pdf]

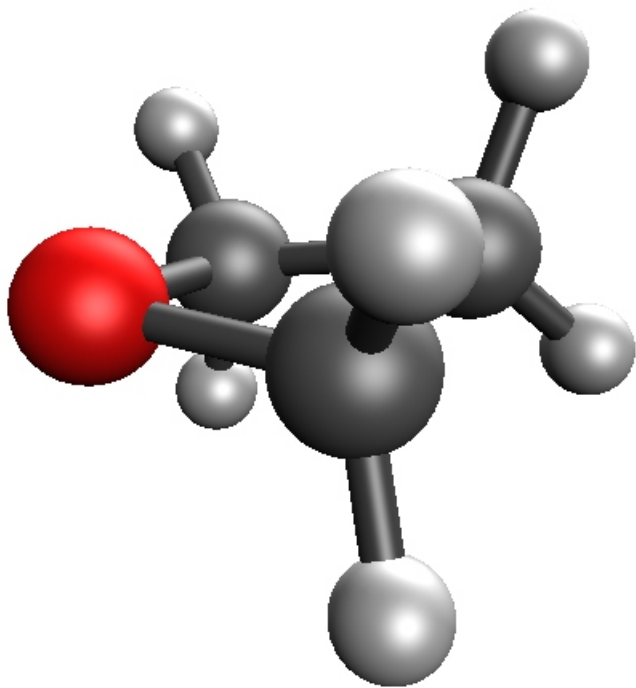

Supplement: d0cp04292g2.zip [file tmo.pdf › SI_figures/pictures_molecules/tmo.pdf]

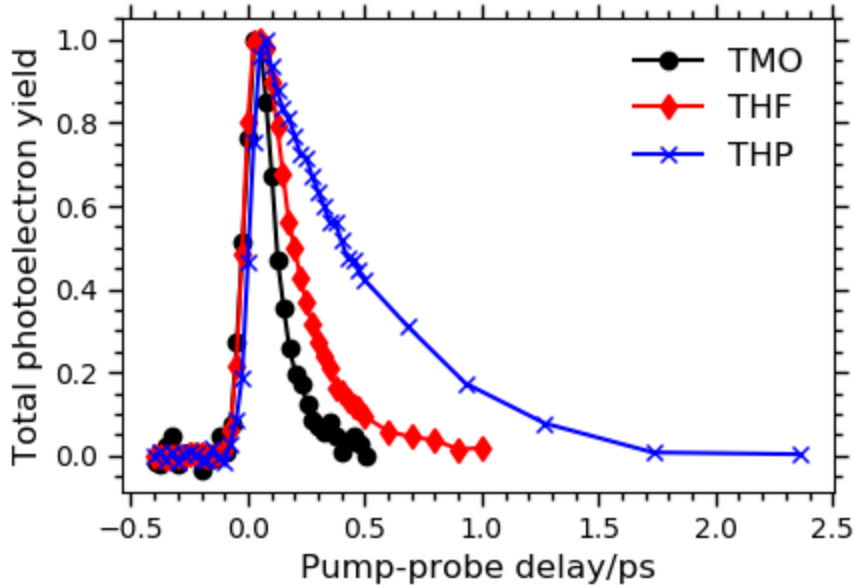

Supplement: d0cp04292g2.zip [file Comparison_decays.pdf › SI_figures/ringstrain/Comparison_decays.pdf]

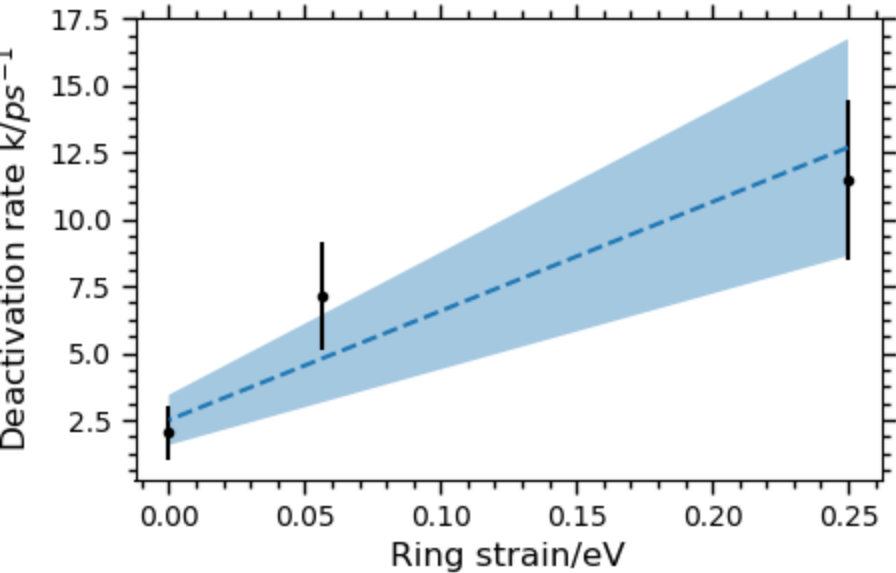

Supplement: d0cp04292g2.zip [file ringstrain.pdf › SI_figures/ringstrain/ringstrain.pdf]

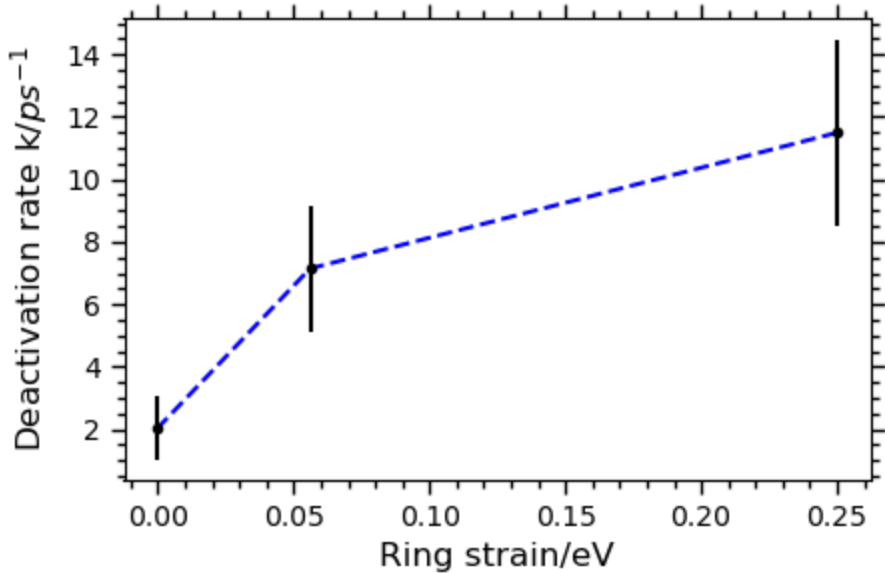

Supplement: d0cp04292g2.zip [file ringstrain4.pdf › SI_figures/ringstrain/ringstrain4.pdf]

0.202 - 0.992 eV

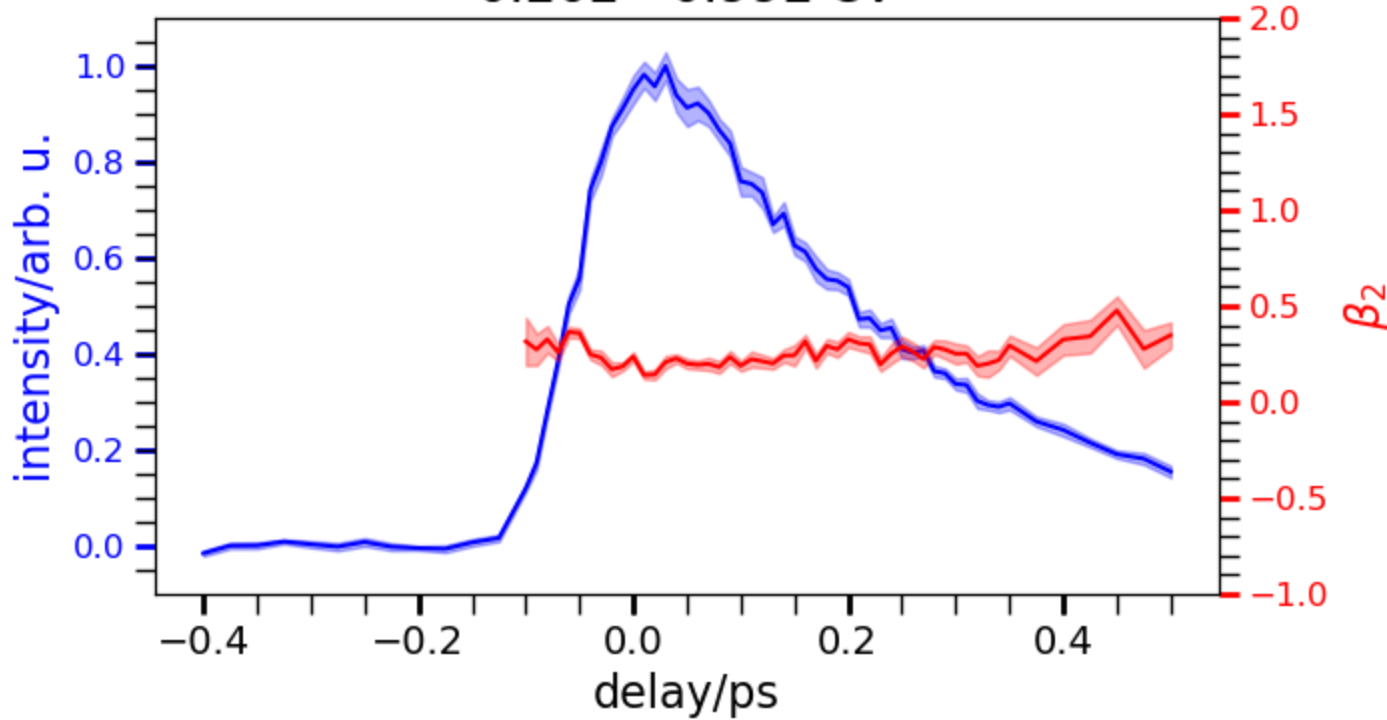

Supplement: d0cp04292g2.zip [file thf_beta20_20273to0_99203eV.pdf › SI_figures/thf/thf_beta20_20273to0_99203eV.pdf]

0.992 - 1.50 eV

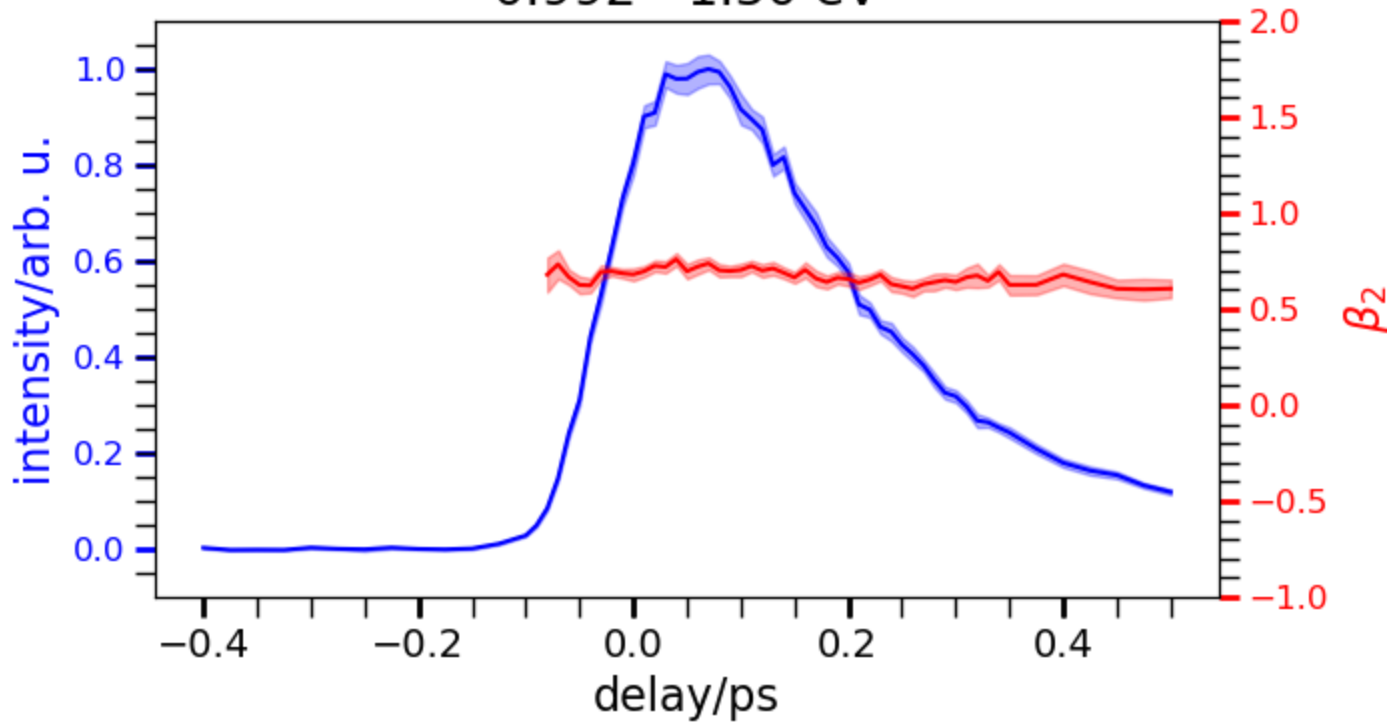

Supplement: d0cp04292g2.zip [file thf_beta20_99203to1_5079eV.pdf › SI_figures/thf/thf_beta20_99203to1_5079eV.pdf]

2.29 - 3.19 eV

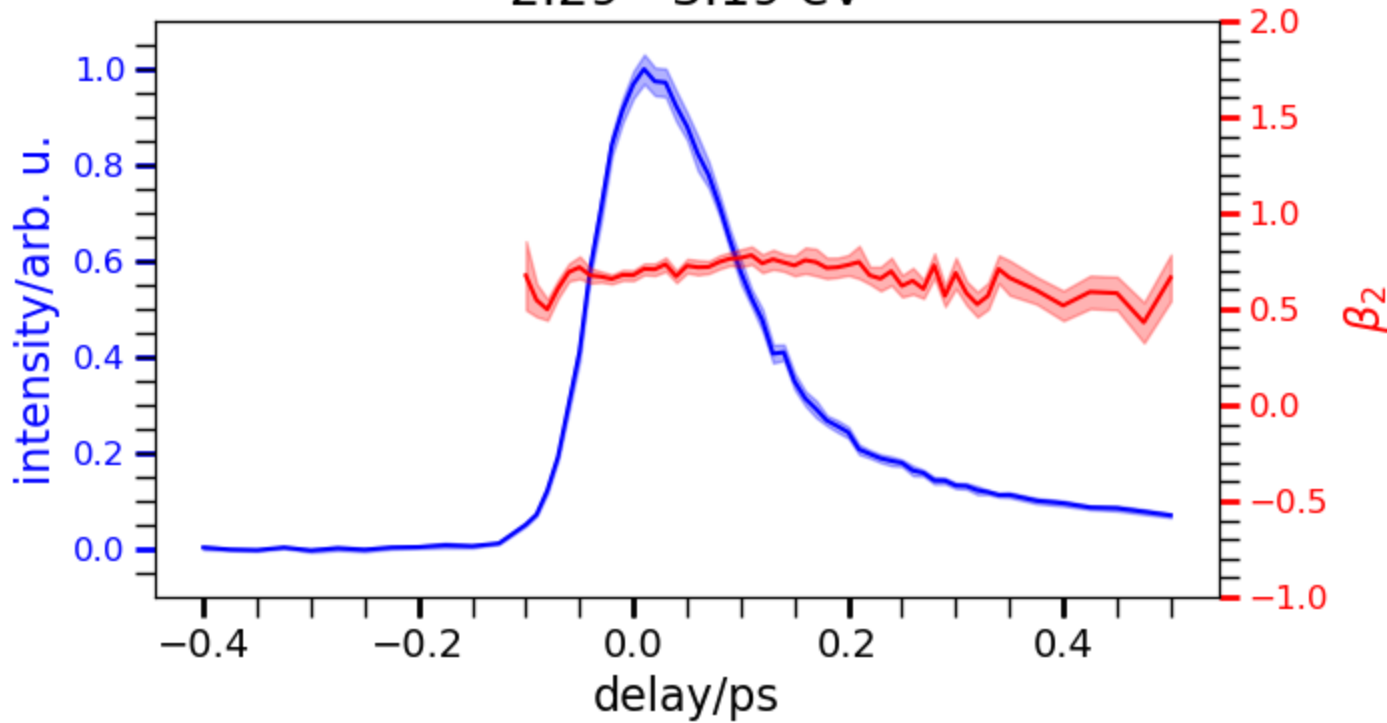

Supplement: d0cp04292g2.zip [file thf_beta22_2936to3_1946eV.pdf › SI_figures/thf/thf_beta22_2936to3_1946eV.pdf]

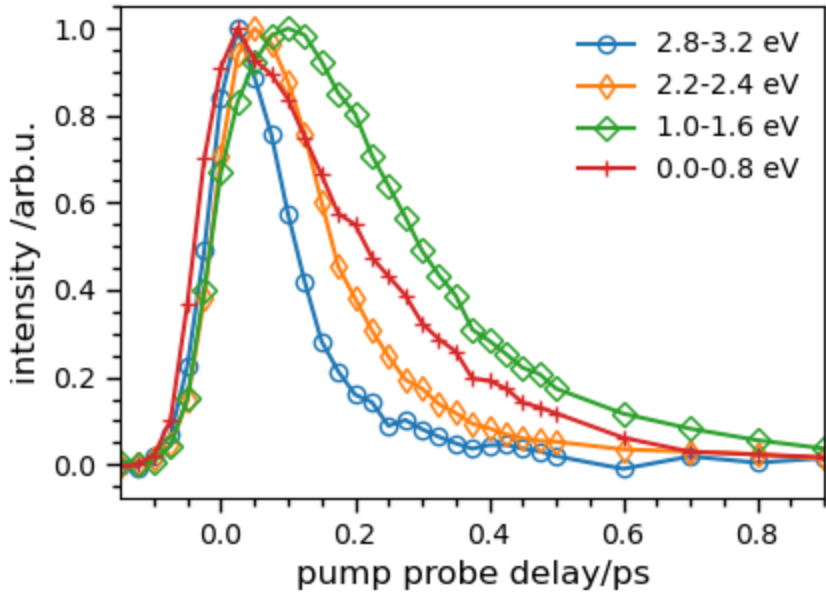

Supplement: d0cp04292g2.zip [file thf_comparison_slices.pdf › SI_figures/thf/thf_comparison_slices.pdf]

0.202 - 0.992 eV

intensity/arb. u.

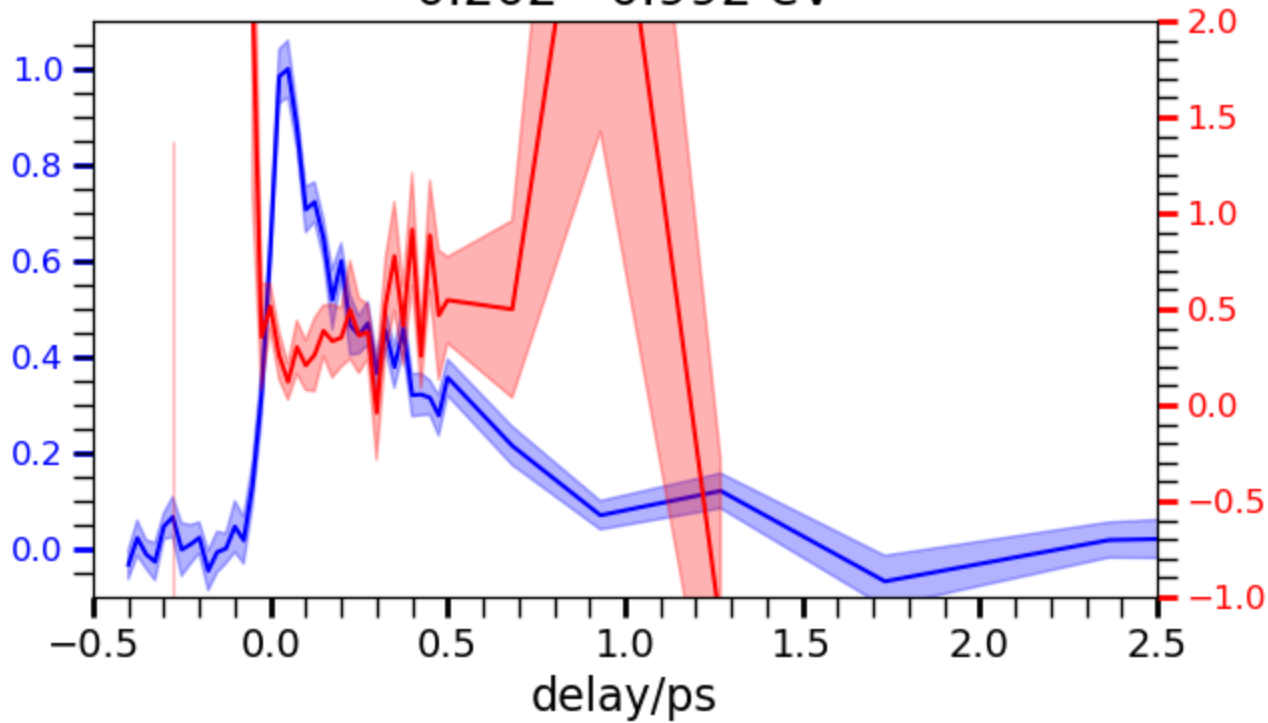

Supplement: d0cp04292g2.zip [file thp_beta20_20273to0_9203eV.pdf › SI_figures/thp/thp_beta20_20273to0_9203eV.pdf]

0.99 - 2.05 eV

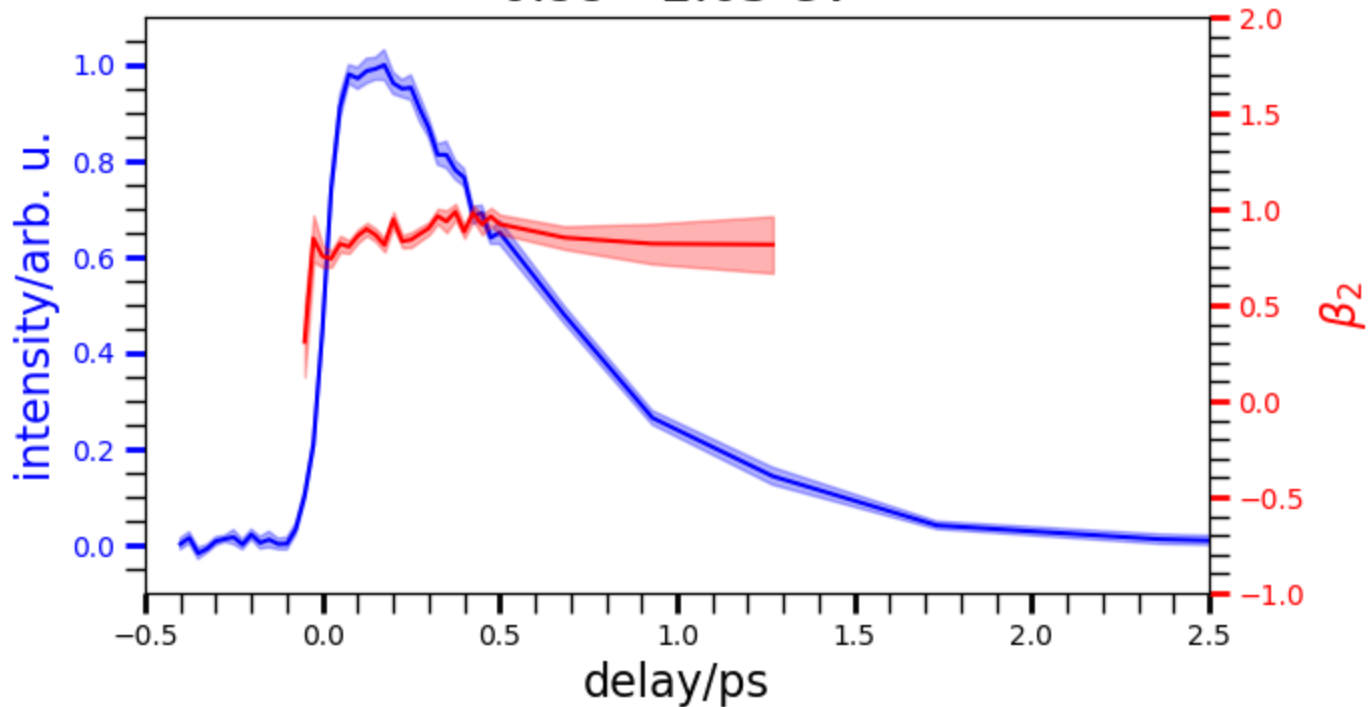

Supplement: d0cp04292g2.zip [file thp_beta20_9900to2_0500eV.pdf › SI_figures/thp/thp_beta20_9900to2_0500eV.pdf]

2.09 - 3.29 eV

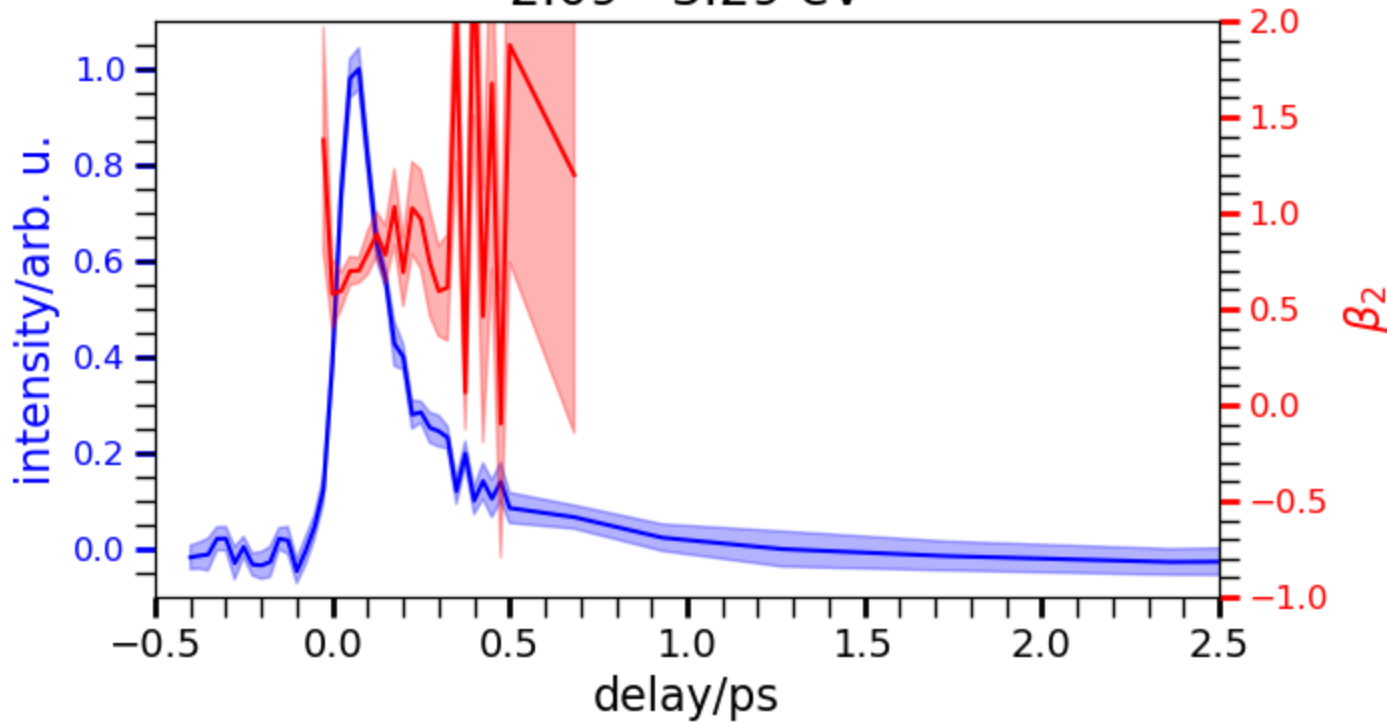

Supplement: d0cp04292g2.zip [file thp_beta22_0917to3_2929eV.pdf › SI_figures/thp/thp_beta22_0917to3_2929eV.pdf]

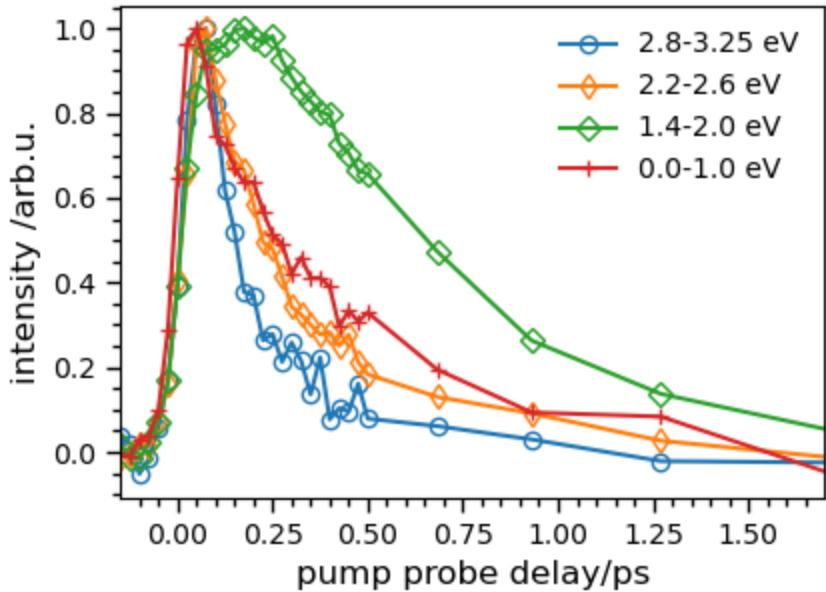

Supplement: d0cp04292g2.zip [file thp_comparison_slices.pdf › SI_figures/thp/thp_comparison_slices.pdf]

0.988 - 1.79 eV

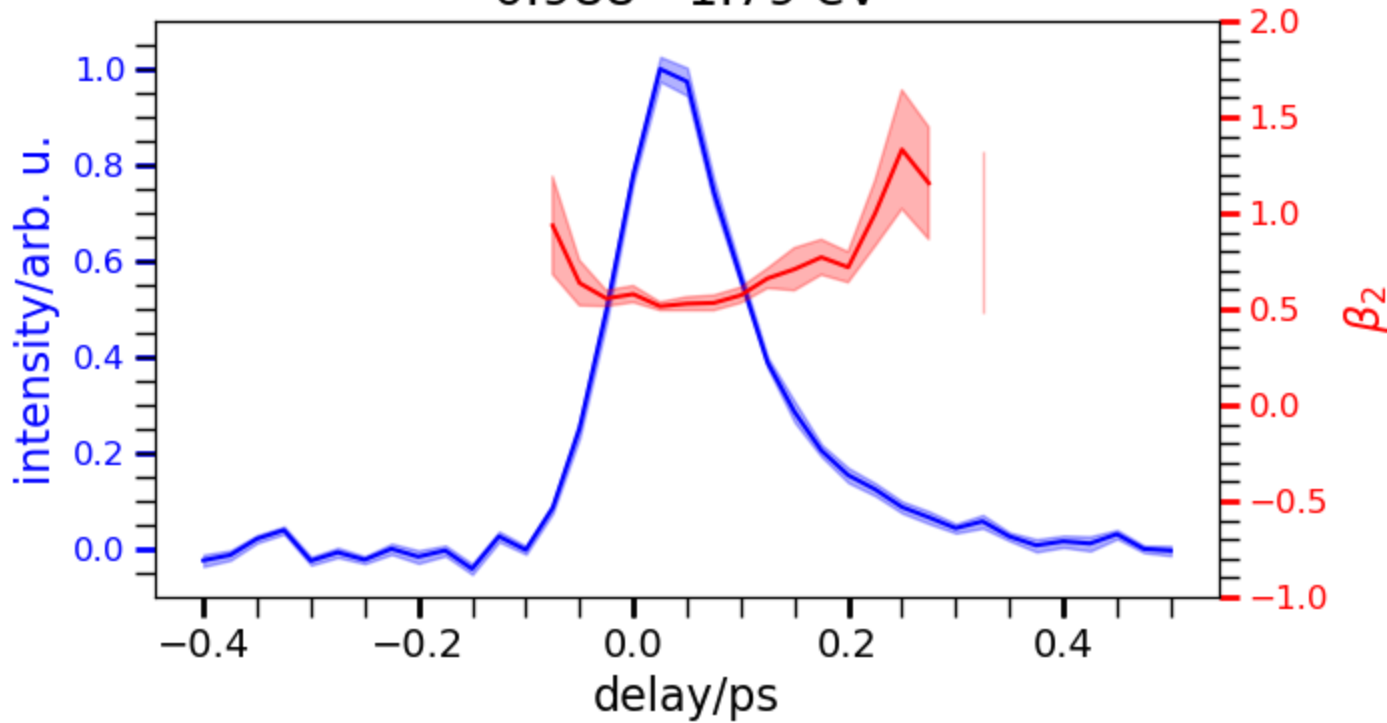

Supplement: d0cp04292g2.zip [file tmo_beta20_98877to1_7946eV.pdf › SI_figures/tmo/tmo_beta20_98877to1_7946eV.pdf]

2.30 - 2.79 eV

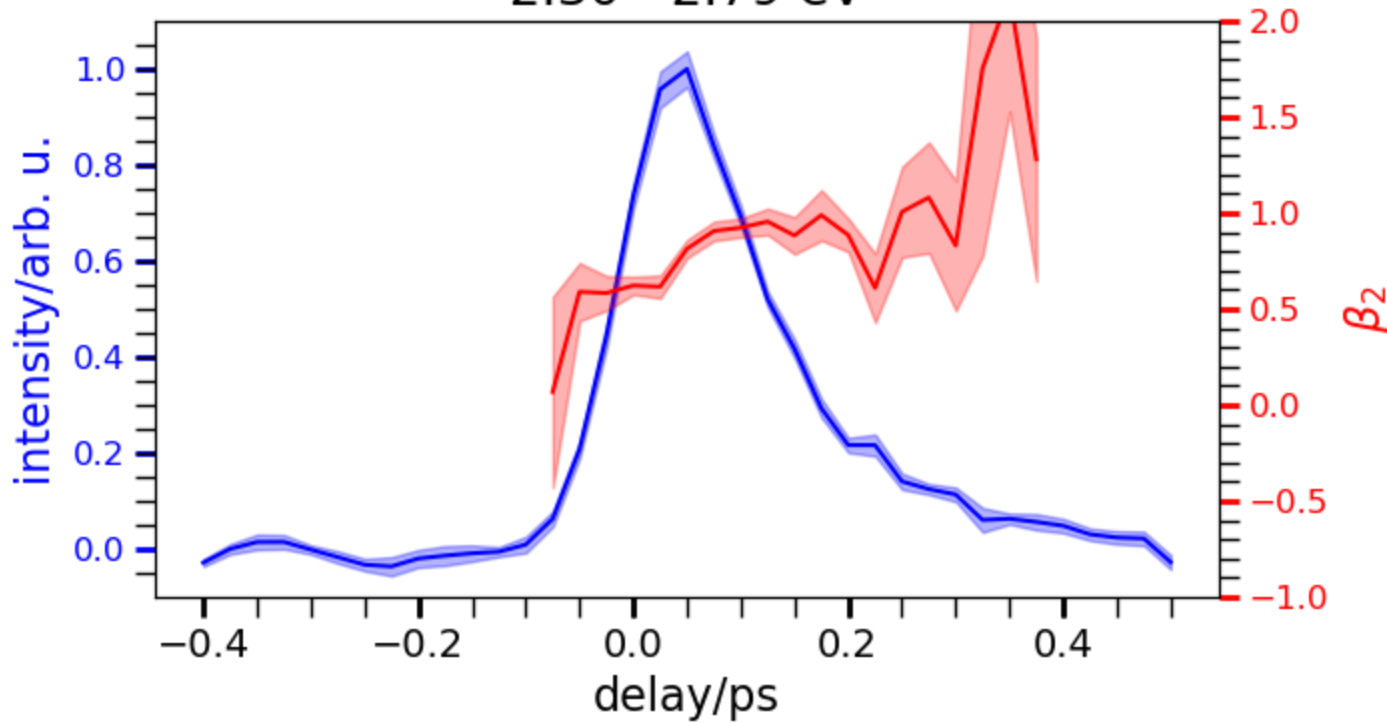

Supplement: d0cp04292g2.zip [file tmo_beta22_3079to2_7925eV.pdf › SI_figures/tmo/tmo_beta22_3079to2_7925eV.pdf]

2.39 - 1.68 eV

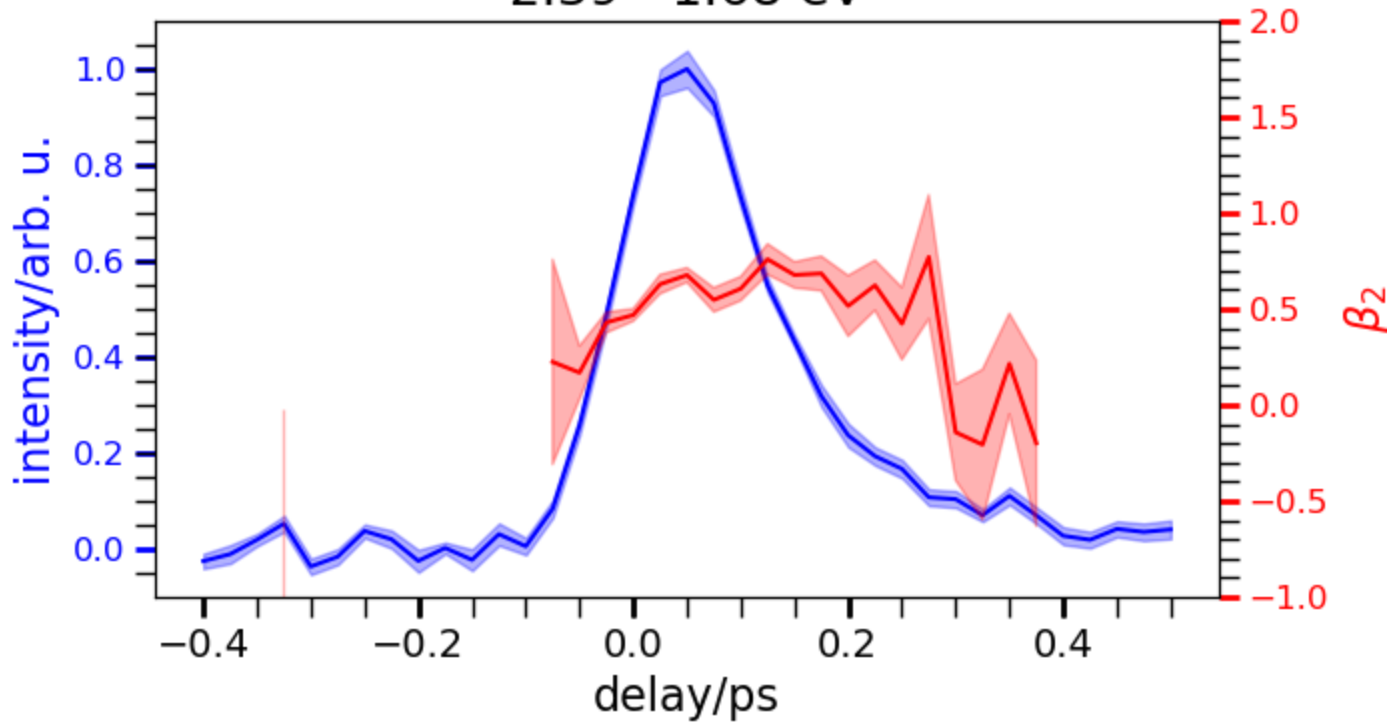

Supplement: d0cp04292g2.zip [file tmo_beta22_3926to1_6853eV.pdf › SI_figures/tmo/tmo_beta22_3926to1_6853eV.pdf]

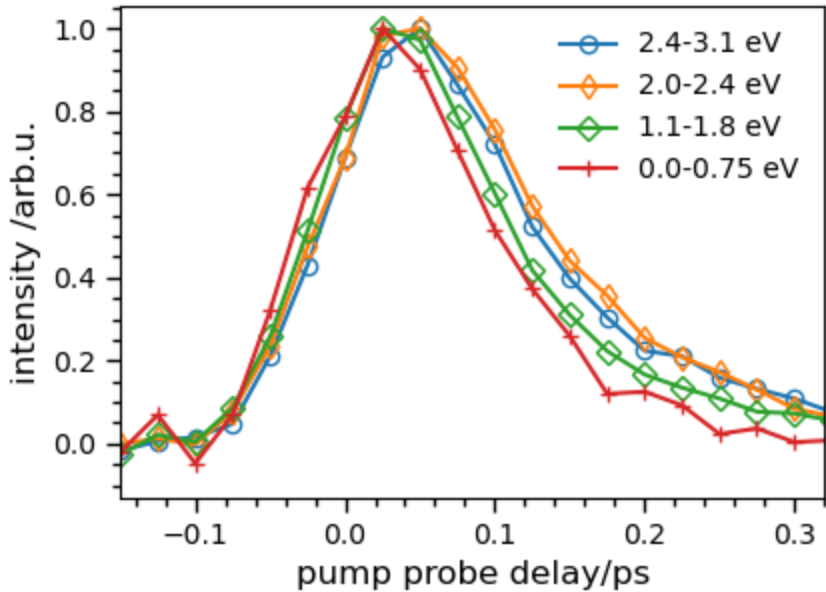

Supplement: d0cp04292g2.zip [file tmo_comparison_slices.pdf › SI_figures/tmo/tmo_comparison_slices.pdf]

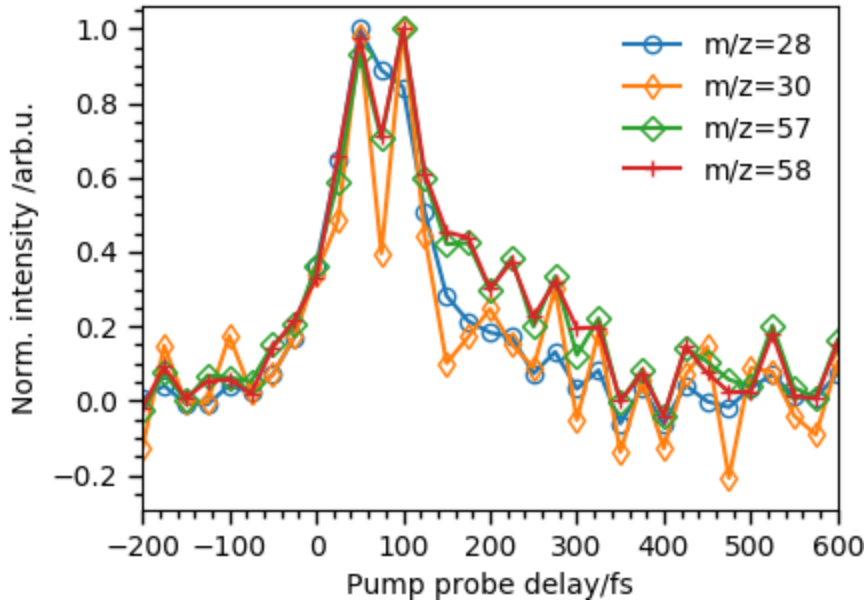

Supplement: d0cp04292g2.zip [file tmo_trms_slices.pdf › SI_figures/tmo/tmo_trms_slices.pdf]
